# Supplementary material
Source: Royal Society of Chemistry journal article supplement (doi:10.1039/d6re00068a)
Supplement: d6re00068a1.pdf [file d6re00068a1.pdf]

## Supporting Information

### **Lithium diisopropylamide-mediated aldol condensation of ethyl acetate and 3-pyridine aldehyde: batch limitations and advantages of continuous processing**

Letao Guo<sup>a,b</sup>, Mei Yang<sup>a,\*</sup>, Lixia Yang<sup>a</sup>, Mei Han<sup>a</sup>, Wenna Tang<sup>a</sup>, Guangwen Chen<sup>a,\*</sup>

*a. Dalian Institute of Chemical Physics, Chinese Academy of Sciences, Dalian 116023, China*

*b. University of Chinese Academy of Sciences, Beijing 100049, China*

---

\* Corresponding author. Tel.: +86-411-8437-9031, Fax.: +86-411-8469-1570

*E-mail address:* yangmei@dicp.ac.cn; gwchen@dicp.ac.cn. ORCID Guangwen Chen: 0000-0001-5290-7921

## 1. Details of HPLC analysis

**HPLC Column type:** C18,  $\Phi$  4.6 $\times$ 150 mm, 5  $\mu$ m particle size (Agilent PN 773450-902). All quantitative characterization was performed using the external standard method.

### $\beta$ -hydroxy ester 3b (tert-butyl 3-hydroxy-(3-pyridyl) propanoate)

**Mobile phase:** 30 vol% 0.1 wt% aqueous formic acid (Mobile phase 1) - 70 vol% methanol (Mobile phase 2); **Injection sample:** 5  $\mu$ l; **Flow rate:** 1 ml $\cdot$ min $^{-1}$ ; **Wavelength of UV detector:** 250 nm; **Column temperature:** 20  $^{\circ}$ C; **Retention time:** 1.6-1.7 min.

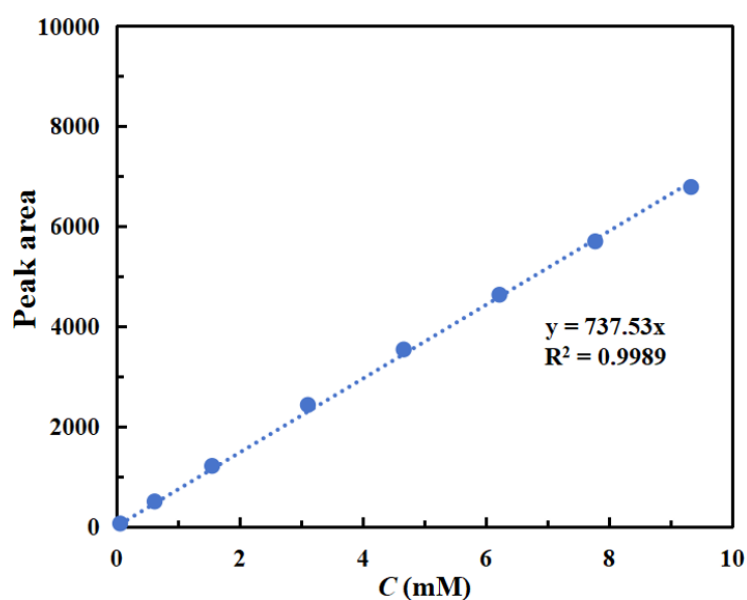

**Figure S1.** External standard curve of tert-butyl 3-hydroxy-(3-pyridyl)propanoate

### Aldehyde 2a (3-pyridine aldehyde)

**Mobile phase:** 50 vol% methanol (Mobile phase 1) - 50 vol% acetonitrile (Mobile phase 2); **Injection sample:** 5  $\mu$ l; **Flow rate:** 1 ml $\cdot$ min $^{-1}$ ; **Wavelength of UV detector:** 250 nm; **Column temperature:** 20  $^{\circ}$ C; **Retention time:** 1.4-1.5 min.

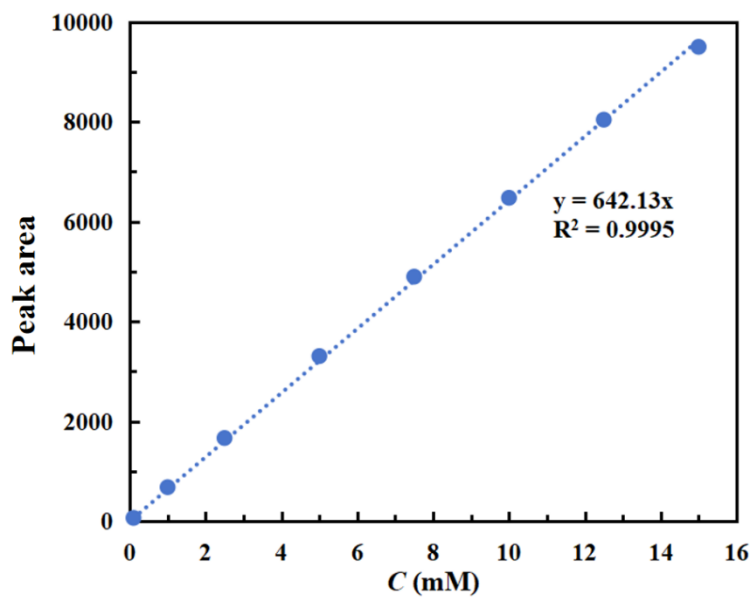

**Figure S2.** External standard curve of 3-pyridine aldehyde

**$\beta$ -hydroxy ester 3a (ethyl 3-hydroxy-3-(pyridin-3-yl)propanoate)**

**Mobile phase:** 70 vol% 0.1 wt% aqueous formic acid (Mobile phase 1) - 30 vol% methanol

(Mobile phase 2); **Injection sample:** 5  $\mu$ L; **Flow rate:** 1 mL/min; **Wavelength of UV detector:**

250 nm; **Column temperature:** 20  $^{\circ}$ C; **Retention time:** 1.67-1.71 min.

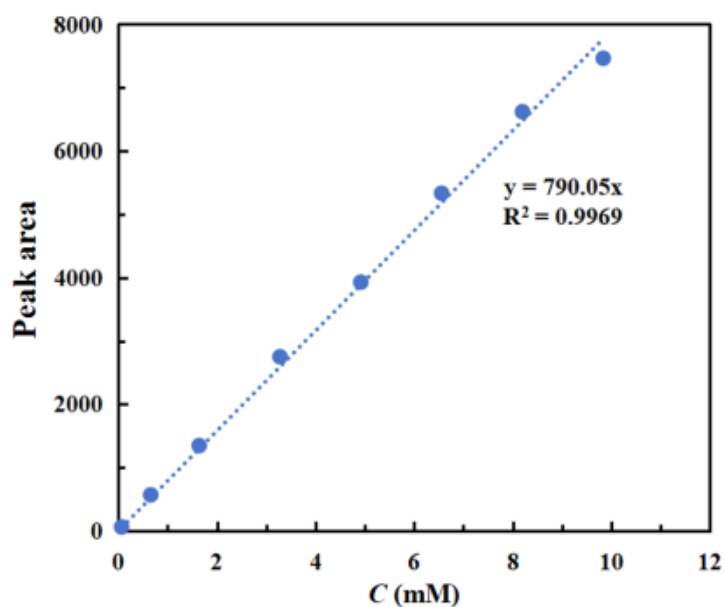

**Figure S3.** External standard curve of ethyl 3-hydroxy-3-(pyridin-3-yl)propanoate

## 2. The $^1\text{H}$ NMR quantification of ester-enolate behaviour

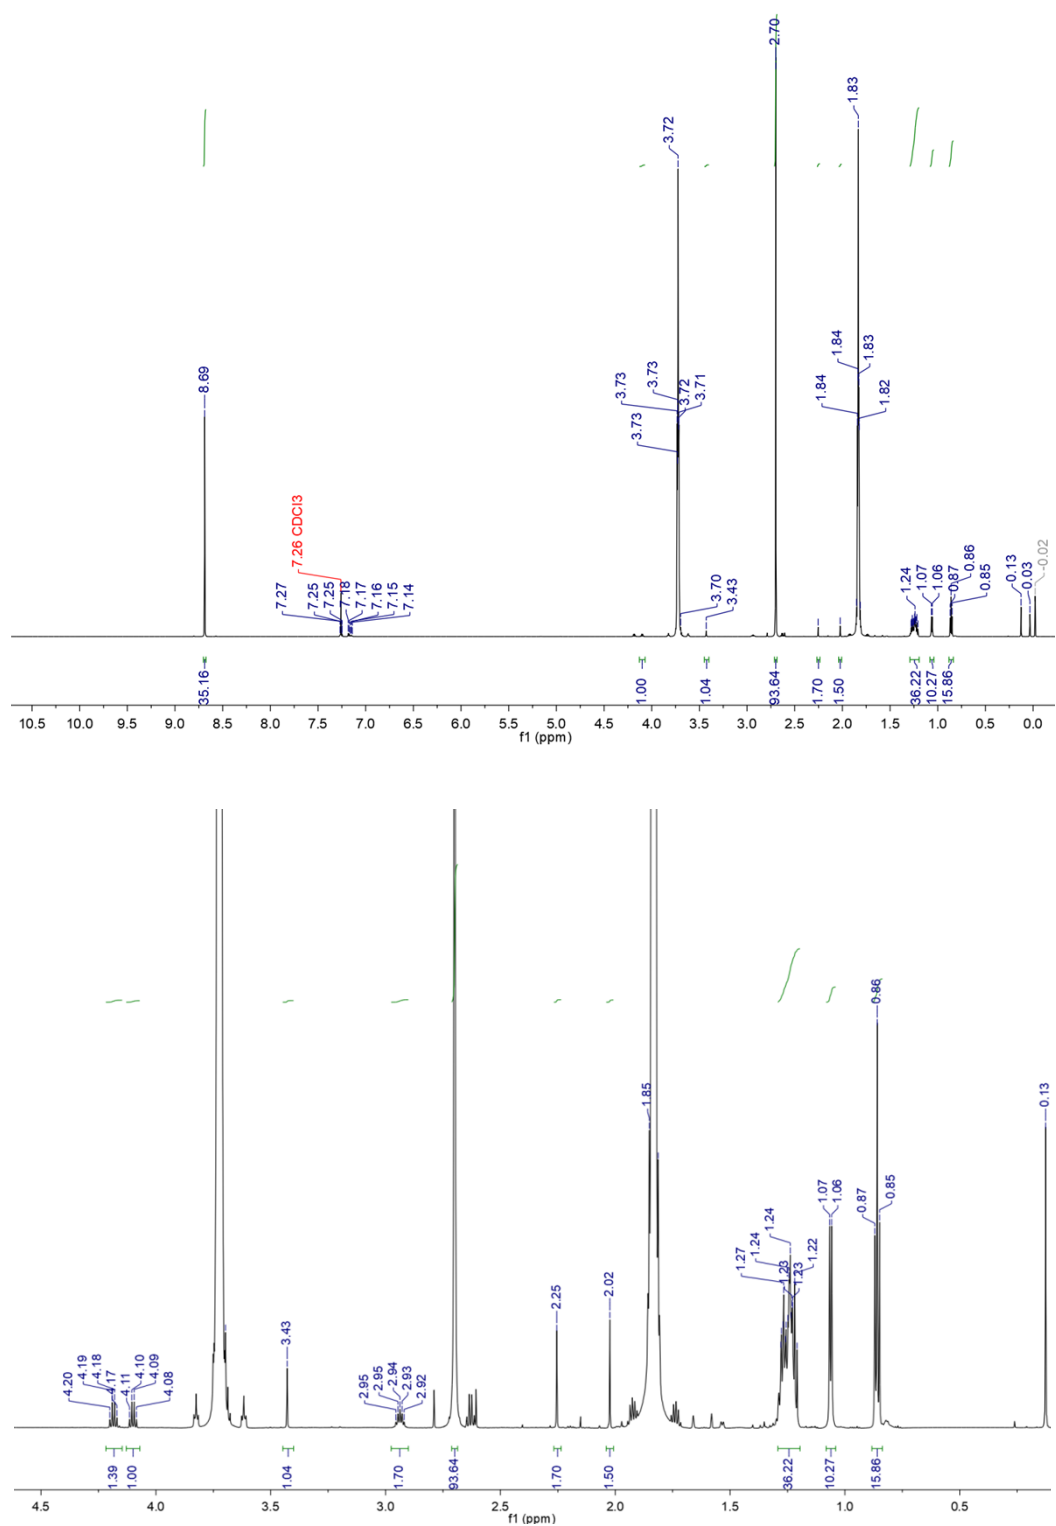

**Figure S4.** Quantitative  $^1\text{H}$  NMR characterization of the organic phase without solvent removal (in  $\text{CDCl}_3$ )

**Table S1.** Summary of the  $^1\text{H}$  NMR peak assignments in Fig. S4 ( $\text{CDCl}_3$ )

| Compound                                                                                                                      | Chemical shift (ppm)                                                  | Chemical shift of pure reagents <sup>a</sup> (ppm) |
|-------------------------------------------------------------------------------------------------------------------------------|-----------------------------------------------------------------------|----------------------------------------------------|
| 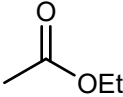                                             | Overlapping with other peaks<br>( $\text{OCH}_2\text{CH}_3$ )         | 1.23 ( $\text{OCH}_2\text{CH}_3$ )                 |
|                                                                                                                               | 2.02 ( $\text{CH}_3\text{CO}$ )                                       | 2.01 ( $\text{CH}_3\text{CO}$ )                    |
|                                                                                                                               | 4.08 ( $\text{OCH}_2\text{CH}_3$ )                                    | 4.09 ( $\text{OCH}_2\text{CH}_3$ )                 |
| <br>(solvent)                                | 1.83                                                                  | -                                                  |
|                                                                                                                               | 3.72                                                                  | -                                                  |
| <br>(internal standard substance)            | 2.70 ( $\text{CH}_3\text{CO}$ )                                       | 2.71 ( $\text{CH}_3\text{CO}$ )                    |
|                                                                                                                               | 8.69 (ph-H)                                                           | 8.71 (ph-H)                                        |
| <br>(solvent from commercial LDA solution) | 0.86 ( $\text{CH}_2\text{CH}_3$ )                                     | 0.88 ( $\text{CH}_2\text{CH}_3$ )                  |
|                                                                                                                               | Overlapping with other peaks<br>1.23-1.3 ( $\text{CH}_2\text{CH}_3$ ) | 1.2-1.33 ( $\text{CH}_2\text{CH}_3$ )              |
| <br>(solvent from commercial LDA solution) | Overlapping with other peaks<br>( $\text{CH}_2\text{CH}_3$ )          | 1.24 ( $\text{CH}_2\text{CH}_3$ )                  |
|                                                                                                                               | Overlapping with other peaks<br>( $\text{CH}_2\text{CH}_3$ )          | 2.65 ( $\text{CH}_2\text{CH}_3$ )                  |
|                                                                                                                               | 7.14-7.27 (ph-H)                                                      | 7.12-7.28 (ph-H)                                   |
|                                            | 1.07 ( $\text{CHCH}_3$ )                                              | 1.0 ( $\text{CHCH}_3$ )                            |
|                                                                                                                               | 2.94 ( $\text{CHCH}_3$ )                                              | 2.93-2.79 ( $\text{CHCH}_3$ )                      |
|                                            | Overlapping with other peaks<br>( $\text{OCH}_2\text{CH}_3$ )         | 1.16 ( $\text{OCH}_2\text{CH}_3$ )                 |
|                                                                                                                               | 2.25 ( $\text{COCH}_3$ )                                              | 2.14 ( $\text{COCH}_3$ )                           |
|                                                                                                                               | 3.43 ( $\text{COCH}_2\text{CO}$ )                                     | 3.34 ( $\text{COCH}_2\text{CO}$ )                  |
|                                                                                                                               | 4.19 ( $\text{OCH}_2\text{CH}_3$ )                                    | 4.07 ( $\text{OCH}_2\text{CH}_3$ )                 |
|                                            | Overlapping with other peaks<br>( $\text{OCH}_2\text{CH}_3$ )         | 1.24 ( $\text{OCH}_2\text{CH}_3$ )                 |
|                                                                                                                               | Overlapping with other peaks<br>( $\text{OCH}_2\text{CH}_3$ )         | 3.7 ( $\text{OCH}_2\text{CH}_3$ )                  |

### 3. The details of mass spectrum

#### 3.1 The overview of the byproducts via MS characterization

Mass spectrometer parameter settings: ESI positive mode, frag-mentor voltage: 180 V

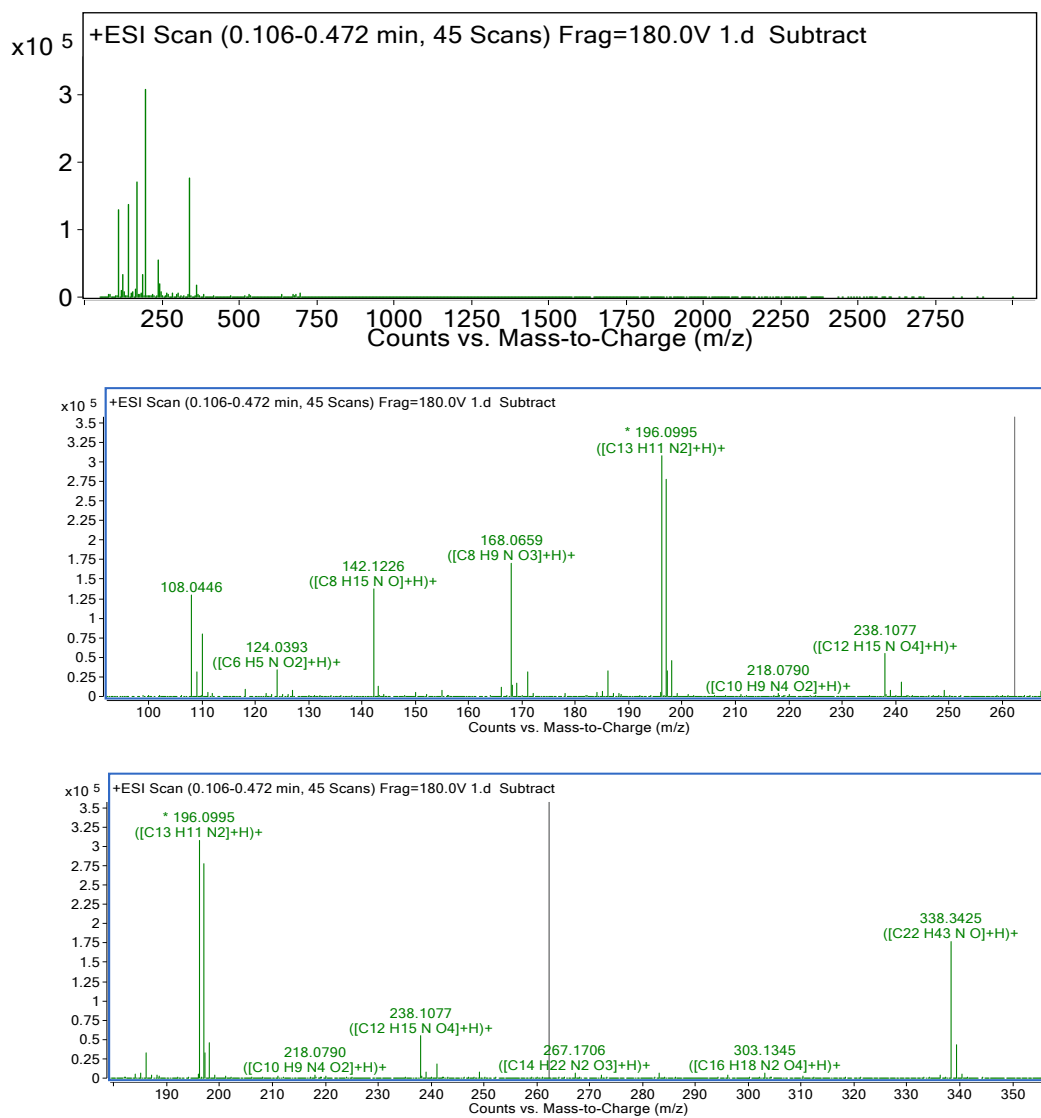

**Figure S5.** The mass spectrum of the organic phase obtained via batch operation at -60 °C. The proposed molecular structures were assigned using the instrument's built-in analysis software.

**Table S2.** Summary of peaks with m/z less than 300 (major ion peaks are labeled in red, while peaks with intensities exceeding 10000 are highlighted in bold to enhance visual clarity)

| m/z             | Intensity                       | m/z             | Intensity                       | m/z             | Intensity                      |
|-----------------|---------------------------------|-----------------|---------------------------------|-----------------|--------------------------------|
| 80.0495         | 3403.03                         | <b>166.0863</b> | <b>12099.44</b>                 | <b>196.2232</b> | <b>37580.9</b>                 |
| 81.9376         | 3144.69                         | <b>168.0659</b> | <b>170241.94</b> <sup>(5)</sup> | <b>196.2421</b> | <b>22103.85</b>                |
| <b>108.0446</b> | <b>129485.6</b> <sup>(1)</sup>  | 168.0799        | 2603.43                         | <b>196.2559</b> | <b>13524.14</b>                |
| 108.0555        | 2859.06                         | <b>168.0914</b> | <b>14001.76</b>                 | 196.2759        | 8581.74                        |
| 108.0652        | 9675.71                         | <b>169.0689</b> | <b>17323.47</b>                 | 197.0812        | 3814.37                        |
| <b>109.0517</b> | <b>31742.01</b>                 | <b>171.0917</b> | <b>30943.77</b>                 | <b>197.1016</b> | <b>278044.34</b>               |
| <b>110.0601</b> | <b>79828.87</b> <sup>(2)</sup>  | 171.1052        | 3110.66                         | <b>197.1282</b> | <b>32774.46</b>                |
| 110.0712        | 3984.32                         | 171.1176        | 2041.26                         | <b>197.1426</b> | <b>13320.74</b>                |
| 110.081         | 4612.38                         | 172.0951        | 3946.76                         | <b>197.1619</b> | <b>15092.03</b>                |
| 111.0634        | 5793.77                         | 178.0864        | 3782.64                         | <b>197.1834</b> | <b>14916.68</b>                |
| 112.0216        | 4397.35                         | 184.1333        | 4963.27                         | <b>198.1025</b> | <b>45402.79</b>                |
| 118.1226        | 9759.79                         | 185.1081        | 6151.56                         | 198.1292        | 2242.9                         |
| 122.0599        | 4316.59                         | <b>186.1152</b> | <b>32901.16</b>                 | 199.1053        | 3273.53                        |
| 122.964         | 3132.23                         | 186.1291        | 3331.64                         | 201.1064        | 2552.54                        |
| <b>124.0393</b> | <b>33407.73</b> <sup>(3)</sup>  | 186.1432        | 2234.18                         | 211.0942        | 2294.67                        |
| 124.0511        | 2796.56                         | 187.1186        | 4380.13                         | 218.079         | 3683.89                        |
| 125.0427        | 2435.11                         | 188.1645        | 3487.1                          | 220.097         | 3207.85                        |
| 126.0913        | 2710.81                         | 188.6484        | 2249.08                         | <b>238.1077</b> | <b>55005.15</b> <sup>(7)</sup> |
| 127.0389        | 8445.57                         | 196.0808        | 5145.9                          | 238.1236        | 2360.52                        |
| <b>142.1226</b> | <b>137056.06</b> <sup>(4)</sup> | <b>196.0995</b> | <b>307996.81</b> <sup>(6)</sup> | 239.1109        | 7352.44                        |
| 142.1353        | 3830.77                         | <b>196.1135</b> | <b>217253.95</b>                | <b>241.1049</b> | <b>18874.88</b>                |
| 142.1462        | 7584.09                         | <b>196.1245</b> | <b>30296.3</b>                  | 241.1203        | 2017.86                        |
| <b>143.126</b>  | <b>13337.68</b>                 | <b>196.1393</b> | <b>27536.22</b>                 | 249.1599        | 7610.73                        |
| 144.0807        | 1999.27                         | <b>196.1574</b> | <b>179445.63</b>                | 267.1706        | 6486.89                        |
| 150.0546        | 5604.72                         | <b>196.179</b>  | <b>140125.77</b>                | 272.1858        | 3942.66                        |
| 155.0703        | 7467.19                         | <b>196.2085</b> | <b>33485.39</b>                 | 296.1496        | 3533.83                        |

**Table S3.** Summary of proposed molecular structures

| Compounds                                                                           | m/z Calculated<br>[M+H] <sup>+</sup>                                          | m/z Found | Error (ppm) | Corresponding<br>peak <sup>a</sup> |
|-------------------------------------------------------------------------------------|-------------------------------------------------------------------------------|-----------|-------------|------------------------------------|
| 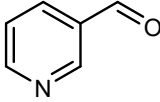   | [C <sub>6</sub> H <sub>5</sub> NO+H] <sup>+</sup><br>108.0444                 | 108.0446  | +1.8        | <b>1</b>                           |
|    | [C <sub>6</sub> H <sub>7</sub> NO+H] <sup>+</sup><br>110.06                   | 110.0601  | +0.9        | <b>2</b>                           |
|    | [C <sub>6</sub> H <sub>5</sub> NO <sub>2</sub> +H] <sup>+</sup><br>124.0393   | 124.0393  | 0           | <b>3</b>                           |
|    | [C <sub>8</sub> H <sub>15</sub> NO+H] <sup>+</sup><br>142.1226                | 142.1226  | 0           | <b>4</b>                           |
|  | [C <sub>8</sub> H <sub>9</sub> NO <sub>3</sub> +H] <sup>+</sup><br>168.0655   | 168.0659  | +2.4        | <b>5</b>                           |
|  | [C <sub>10</sub> H <sub>13</sub> NO <sub>3</sub> +H] <sup>+</sup><br>196.0968 | 196.0995  | +13.8       | <b>6</b>                           |
|  | [C <sub>12</sub> H <sub>15</sub> NO <sub>4</sub> +H] <sup>+</sup><br>238.1074 | 238.1077  | +1.3        | <b>7</b>                           |

**Note:** <sup>a</sup> The corresponding ion peaks were labeled in Table S2.

### 3.2 The separation of byproducts B3 via GC-MS

**Mass spectrometer parameter settings:** ESI mode, frag-mentor voltage: 180 V. The proposed molecular structures were assigned using the instrument's built-in analysis software.

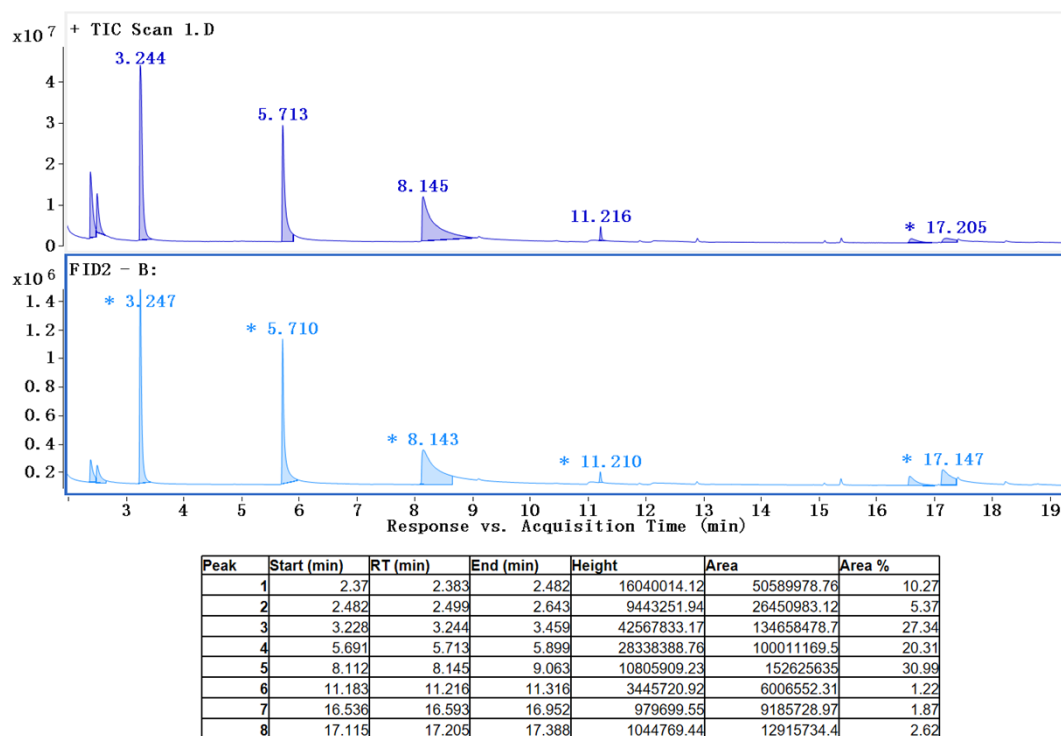

**Figure S6.** GC-MS characterization details

**Identified compound 1:** Ethyl acetate (extractant present in the reaction mixture for MS characterization) (Retention time: 2.373 min).

**Identified compound 2:** Tetrahydrofuran (solvent present in the reaction mixture for MS characterization) (Retention time: 2.489 min).

**Identified compound 3:** Tert-butyl acetate (Retention time: 3.234 min)

**Identified compound 4:** Toluene (solvent present in commercial LDA solution) (Retention time: 5.7 min)

**Identified compound 5:** 3-pyridine aldehyde (**2a**) (Retention time: 8.125 min)

**Identified compound 6:** the main byproduct observed in bath operation

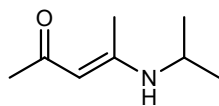

[C<sub>8</sub>H<sub>15</sub>NO] calculated [M] 141.1148

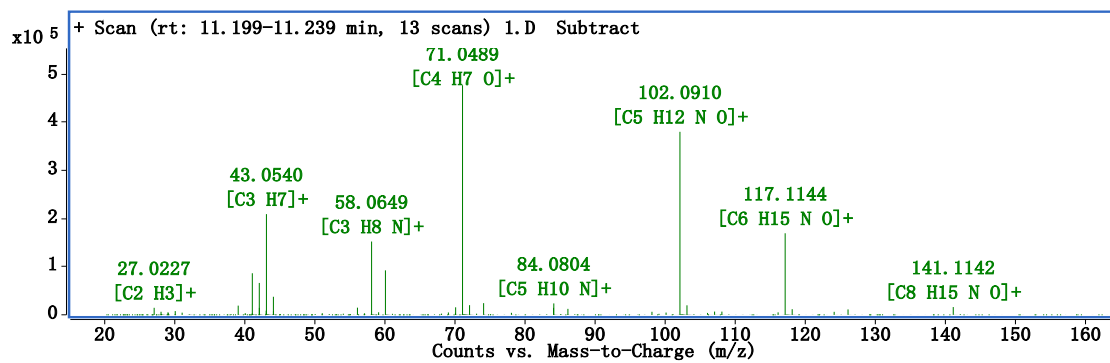

**Figure S7.** Mass spectrum obtained by GC-MS (Retention time: 11.2 min).

#### 4. Villiermaux-Dushman method

To get more details about the mixing performance on the microscale, the Villiermaux-Dushman method was employed, including the following parallel competing reactions:

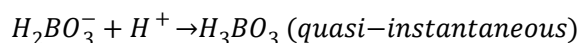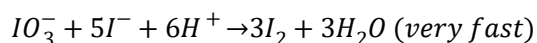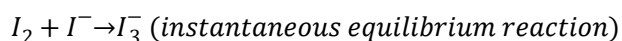

The neutralisation of  $H_2BO_3^-$  ions is quasi-instantaneous, while the Dushman reaction is much slower than the neutralisation reaction, but in the same characteristic time scale with the micromixing process. As for perfect mixing, the  $H^+$  ions are instantaneously consumed by  $H_2BO_3^-$  ions. The Dushman reaction cannot happen due to the stoichiometric defect of  $H^+$  ions. In the case of imperfect mixing, a local stoichiometric excess of  $H^+$  ions whose amount is larger than that required by neutralisation of  $H_2BO_3^-$  ions exists. Therefore, the  $H^+$  ions are consumed competitively by the neutralisation of  $H_2BO_3^-$  ions and the Dushman reaction. The formed  $I_2$  further reacts with  $I^-$  ions to yield  $I_3^-$  ions. The amount of produced  $I_3^-$  ions depends on the micromixing efficiency and can be monitored by a UV-Vis spectrophotometer (UV2700, Shimadzu, Japan) at 353 nm. The extinction coefficient of  $I_3^-$  was  $25505 \text{ L}\cdot\text{mol}^{-1}\cdot\text{cm}^{-1}$  measured in this study.

All the experiments were carried out at room temperature (20 °C). In a typical experimental procedure, a solution containing  $H_3BO_3$ , NaOH, KI and  $KIO_3$  (Solution A) and a diluted  $H_2SO_4$  solution (Solution B) were prepared separately. The mixed solution and the  $H_2SO_4$  solution were independently introduced into M1 using syringe pumps. The experimental procedure followed that illustrated in Fig. 3, except that the continuous-flow platform used for mixing performance evaluation consisted only of M1 and C1. After the system reached steady state, the reaction effluent was collected at the outlet and its absorbance at 353 nm was measured within 1 min using a UV-vis spectrophotometer (UV2700, Shimadzu, Japan). Based on the obtained concentration of  $I_3^-$  ions, the segregation index ( $X_s$ ) which was defined to quantify the micromixing performance could be calculated by above equations:

$$\begin{aligned}
X_s &= \frac{Y}{Y_{ST}} \\
Y &= \frac{2(V_A + V_B)([I_2] + [I_3^-])}{V_B[H^+]_0} \\
Y_{ST} &= \frac{6[IO_3^-]_0}{6[IO_3^-]_0 + [H_2BO_3^-]_0}
\end{aligned} \tag{S1-S3}$$

where  $Y$  denotes the ratio of the mole number of acid consumed by the Dushman reaction to the total mole number of the  $H^+$  ions injected.  $Y_{ST}$  is the value of  $Y$  in the total segregation when the micromixing process is infinitely slow. In this case, the  $H^+$  ions are proportionally consumed by the  $H_2BO_3^-$  ions and  $I^-/IO_3^-$  ions according to their local concentrations.  $V_A$  and  $V_B$  are the volumetric flow rates of the mixed solution and  $H_2SO_4$  solution, respectively.  $[I_2]$  and  $[I_3^-]$  are the concentrations of  $I_2$  and  $I_3^-$  ions in the reaction effluent, while  $[H^+]_0$  is the initial concentration of  $H^+$  ions in  $H_2SO_4$  solution, and  $[IO_3^-]_0$  and  $[H_2BO_3^-]_0$  are the initial concentrations of  $IO_3^-$  and  $H_2BO_3^-$  ions in the mixed solution. The value of  $X_s$  equals to 0 for perfect mixing state, while  $X_s$  is 1 for complete segregated state.

**Table S4 The composition of mixing solution (Solution A) and  $H_2SO_4$  solution (Solution B)**

| Compound      | Concentration (M) |
|---------------|-------------------|
| $H_3BO_3$ (A) | 0.2               |
| NaOH (A)      | 0.1               |
| KI (A)        | 0.0116            |
| $KIO_3$ (A)   | 0.00223           |
| $H_2SO_4$ (B) | 0.02              |

According to the study of Yang et al. (*Ind. Eng. Chem. Res.*, 2005, **44**, 7730-7737), for incorporation model, a limited fluid, acid, is divided into aggregates and progressively invaded by environmental fluid that contains iodide and iodate in a basic medium. Acid aggregates grow by progressively incorporating the surrounding medium where neutralisation of  $H_2BO_3^-$  ions and Dushman reaction take place. The characteristic time of incorporation,  $t_m$ , is assumed to be equal to the micromixing time. The volume of the aggregate grows according to following equation:

$$V_2 = V_{20}g(t) \tag{S4}$$

where  $V_2$  is the volume of the acid aggregate,  $V_{20}$  is the initial volume of the acid aggregate, and  $g(t)$  is the incorporation function with the form:

$$g(t) = \exp(t/\tau_m) \text{ or } g(t) = 1 + t/\tau_m \quad \text{S5}$$

where  $\tau_m$  is the characteristic micromixing time.

The concentrations of the  $j$  species can be calculated by the following equation:

$$\frac{dC_j}{dt} = (C_{j10} - C_j) \frac{1}{g} \frac{dg}{dt} + R_j \quad \text{S6}$$

where subscript 10 represents the surrounding fluid and  $R_j$  is the net production rate of species  $j$  ( $j = \text{H}_2\text{BO}_3^-$ ,  $\text{H}^+$ ,  $\text{I}^-$ ,  $\text{IO}_3^-$ ,  $\text{I}_2$  or  $\text{I}_3^-$ ) for the reaction. When  $g(t) = \exp(t/\tau_m)$ , Equation S6 can be transformed to:

$$\frac{dC_j}{dt} = \frac{C_{j10} - C_j}{\tau_m} + R_j$$

S7

With a series of presumed value of micromixing time and known initial concentration of different ions in each solution, Equation S7 could be solved by MATLAB (ode15s). The value of time step was fixed at  $10^{-8}$  s, and the integration process was terminated when the  $\text{H}^+$  ions were completely consumed with  $10^{-8}$  M as the criterion.

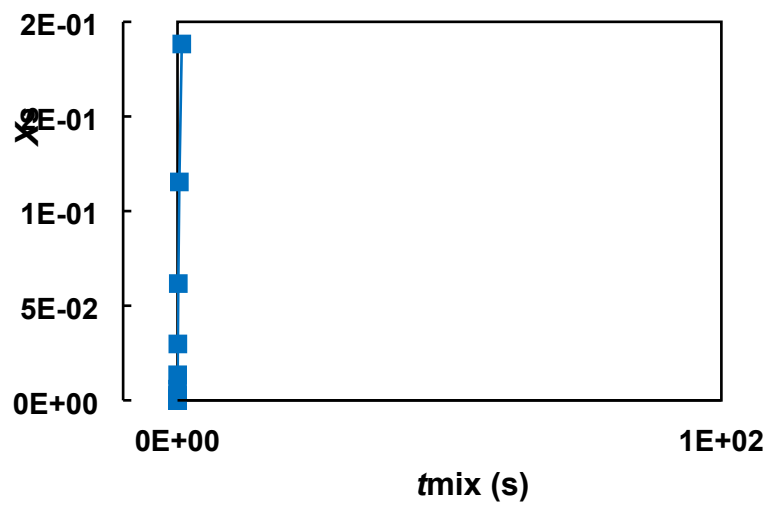

**Figure S8.** Relationship between micromixing time and segregation index obtained from

incorporation model.

## 5. Other additional experimental data

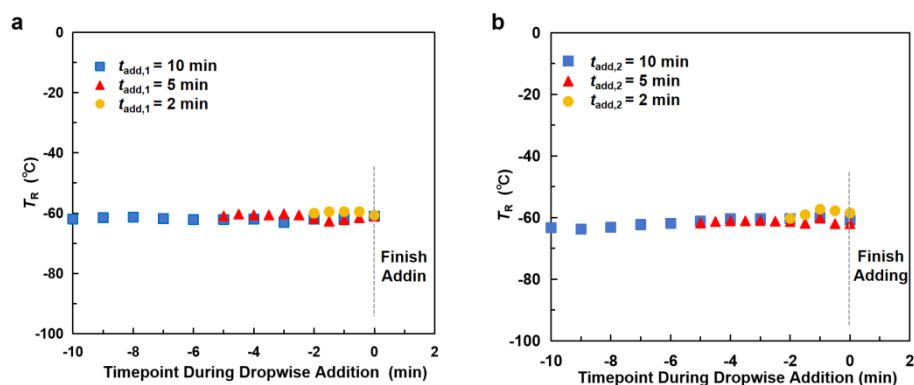

**Figure S9.** Temperature profiles recorded during rapid addition of the ester-THF and **2a**-THF solutions. (a) The recorded temperature during different addition time of the ester-THF corresponding to the Fig. 4a. (b) The recorded temperature during different addition time of the aldehyde-THF corresponding to the Fig. 5a.

### The space time yield (STY)

For the batch operation, the STY was calculated according to the following equation:

$$\text{STY} = \frac{m_p}{t_R \times V_R} = \frac{C_{EA} \times V_{EA} \times MW_{3a} \times Y_{3a}}{t_R \times V_R} \quad \text{S8}$$

where  $m_p$  is the mass of product **3a**,  $t_R$  is the total operation time including dropwise addition and reaction ( $t_R = 45$  min),  $V_R$  is the total reaction volume ( $V_R = 60$  mL),  $C_{EA}$  is the concentration of EA in EA-THF solution ( $C_{EA} = 0.5$  M),  $V_1$  is the volume of EA-THF solution ( $V_{EA} = 20$  mL),  $MW_{3a}$  is the molecular weight of **3a** ( $MW_{3a} = 195$  g/mol), and  $Y_{3a}$  was the yield of **3a**.

For the continuous-flow operation, the STY was calculated according to the following equation:

$$\text{STY} = \frac{C_{EA} \times Q_{EA} \times MW_{3a} \times Y_{3a}}{V_{C1} + V_{C2}} \quad \text{S9}$$

where  $V_{C1}$  and  $V_{C2}$  were the volumes of the capillary C1 and C2, respectively.  $Q_{EA}$  was the flow rate of EA-THF solution.

### E-factor

The E-factor was calculated according to the following equation:

$$\text{E - factor} = \frac{\sum m_{\text{input}} - m_{\text{product}}}{m_{\text{product}}} \quad \text{S10}$$

where m corresponds to the mass (expressed in g).

**Table S5** Batch operation ( $C_{LDA} = 1.0$  M,  $C_{EA} = C_{2a} = 0.5$  M)

Considering 60 mL total volume

| Compound                        | Mass (g)      |
|---------------------------------|---------------|
| n-Heptane                       | 2.63          |
| Ethyl benzene                   | 1.33          |
| THF                             | 49.09         |
| Ethyl acetate                   | 0.88          |
| 3-pyridine aldehyde             | 1.07          |
| LDA                             | 2.15          |
| H <sub>2</sub> O                | 60            |
| NH <sub>4</sub> Cl              | 22.32         |
| Na <sub>2</sub> SO <sub>4</sub> | 11.7          |
| <b>Total</b>                    | <b>151.17</b> |

**Table S6** Continuous-flow operation ( $C_{LDA} = 0.6$  M,  $C_{EA} = C_{2a} = 0.5$  M,  $Q_{LDA} = Q_{EA} = Q_{2a} = 2$  mL/min)

Considering a 10 min operation

| Compound                        | Mass (g)      |
|---------------------------------|---------------|
| n-Heptane                       | 1.58          |
| Ethyl benzene                   | 0.8           |
| THF                             | 49.09         |
| Ethyl acetate                   | 0.88          |
| 3-pyridine aldehyde             | 1.07          |
| LDA                             | 1.29          |
| H <sub>2</sub> O                | 60            |
| NH <sub>4</sub> Cl              | 22.32         |
| Na <sub>2</sub> SO <sub>4</sub> | 11.7          |
| <b>Total</b>                    | <b>148.73</b> |

### Process mass intensity (PMI)

The PMI was calculated according to the following equation:

$$\text{PMI} = \frac{\sum m_{\text{input}}}{m_{\text{product}}} = \text{E-factor} + 1 \quad \text{S11}$$

where m corresponds to the mass (expressed in g).

## 6. The separation of byproduct B2

### Pyridin-3-ylmethanol (separated from aldol condensation byproducts)

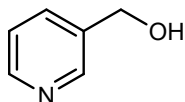

### Separation details

The byproduct **B2** was also separated in our previous research (Guo et al. *Chen, Chin. J. Chem. Eng.* DOI: 10.1016/j.cjche.2025.10.011). Herein, we tried to separate it again and the byproduct **B2** can also be observed in reaction mixture via batch operation by TLC monitor. Through silica gel chromatographic separation, we obtained the **B2** with pale yellow oil. After removing solvent, the mixture was characterized by <sup>1</sup>H NMR.

### Characterization data:

<sup>1</sup>H NMR (400 MHz, d<sub>6</sub>-DMSO) δ 8.52 (d, *J* = 2.2 Hz, 1H), 8.45 (dd, *J* = 4.8, 1.7 Hz, 1H), 7.72 (dt, *J* = 7.8, 2.1 Hz, 1H), 7.34 (ddd, *J* = 7.8, 4.8, 0.9 Hz, 1H), 4.53 (s, 2H) ppm.

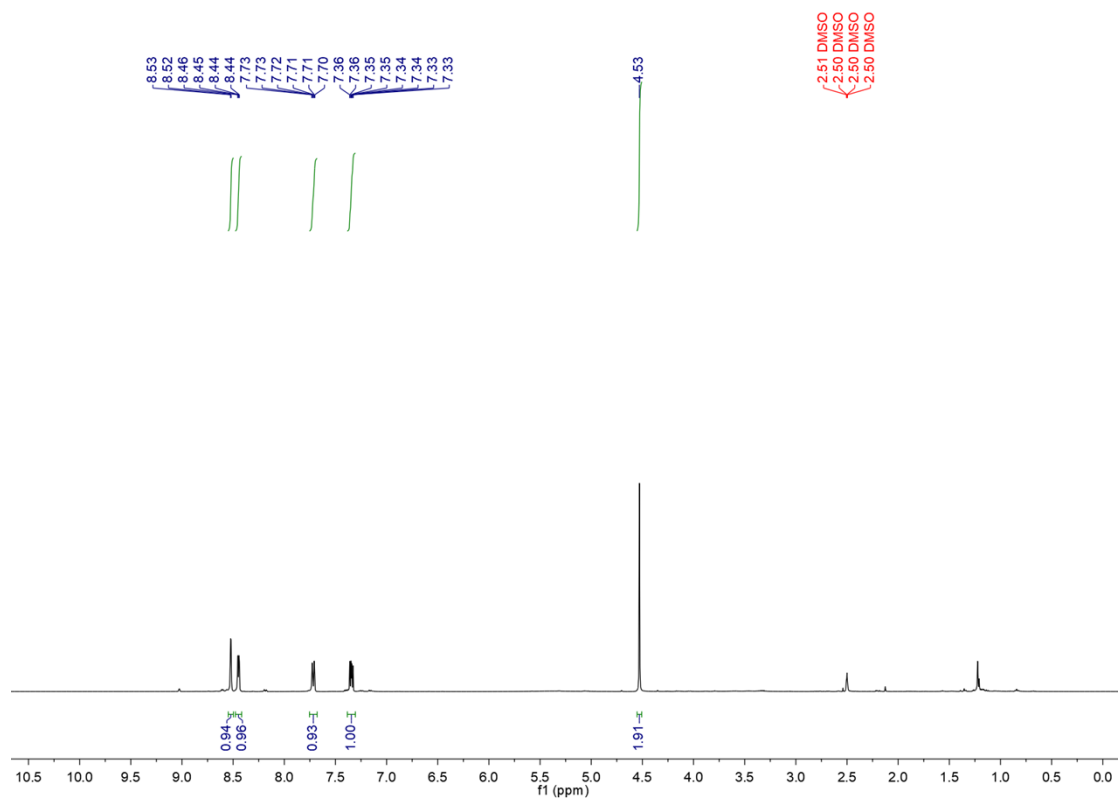

## 7. <sup>1</sup>H Characterization of aldol condensation products

### Ethyl 3-hydroxy-3-phenylpropanoate (3c)

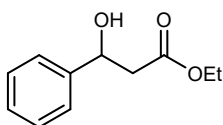

#### Characterization data:

<sup>1</sup>H NMR (700 MHz, Chloroform-d)  $\delta$  7.40 - 7.22 (m, 5H), 5.11 (dd,  $J = 9.3, 3.7$  Hz, 1H), 4.16 (q,  $J = 7.2$  Hz, 2H), 2.76 - 2.64 (m, 2H), 1.24 (t,  $J = 7.2$  Hz, 3H) ppm.

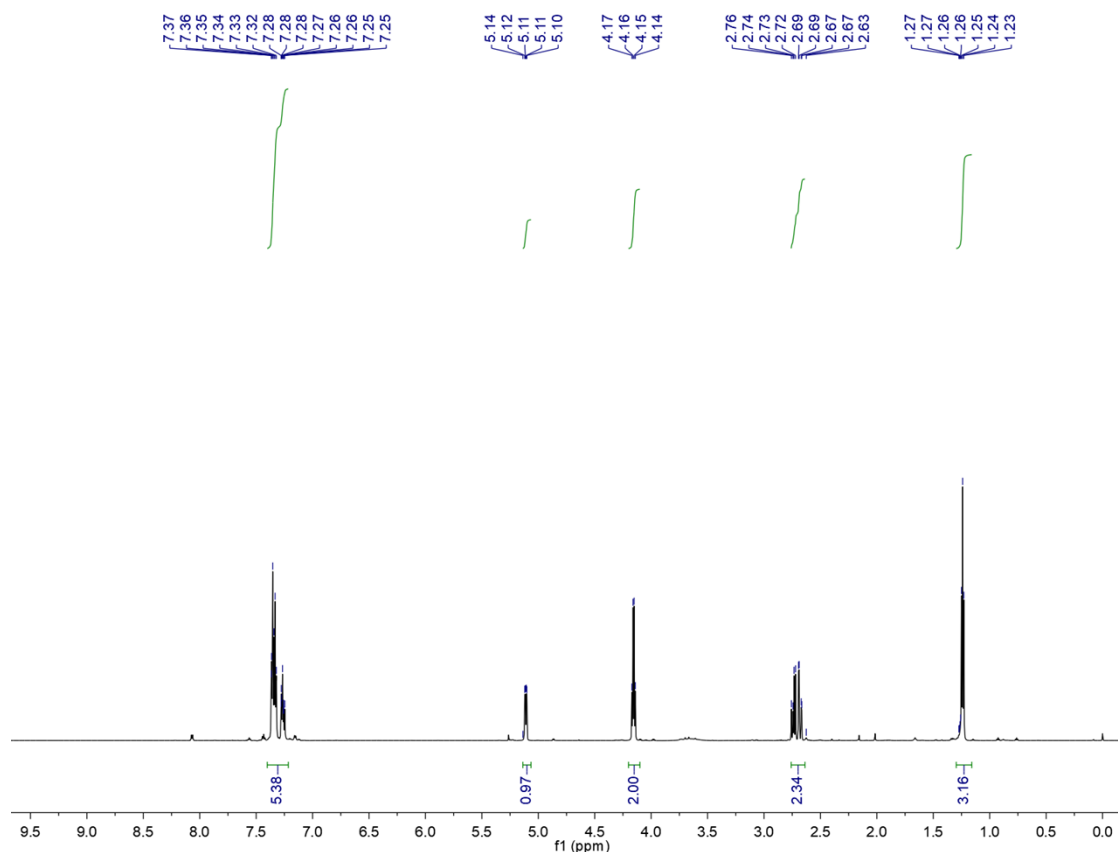

### Ethyl 3-hydroxybut-3-enoate (3d)

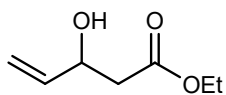

#### Characterization data:

$^1\text{H}$  NMR (700 MHz, Chloroform- $d$ )  $\delta$  5.86 (ddd,  $J = 16.7, 10.5, 5.5$  Hz, 1H), 5.29 (dd,  $J = 17.2, 1.7$  Hz, 1H), 5.12 (dd,  $J = 10.5, 1.7$  Hz, 1H), 4.15 (q,  $J = 7.1$  Hz, 2H), 2.58 - 2.44 (m, 2H), 1.24 (t,  $J = 7.2$  Hz, 3H) ppm.

$^{13}\text{C}$  NMR (101 MHz,  $\text{CDCl}_3$ )  $\delta$  172.22, 138.90, 115.33, 68.93, 60.77, 41.23, 14.15 ppm.

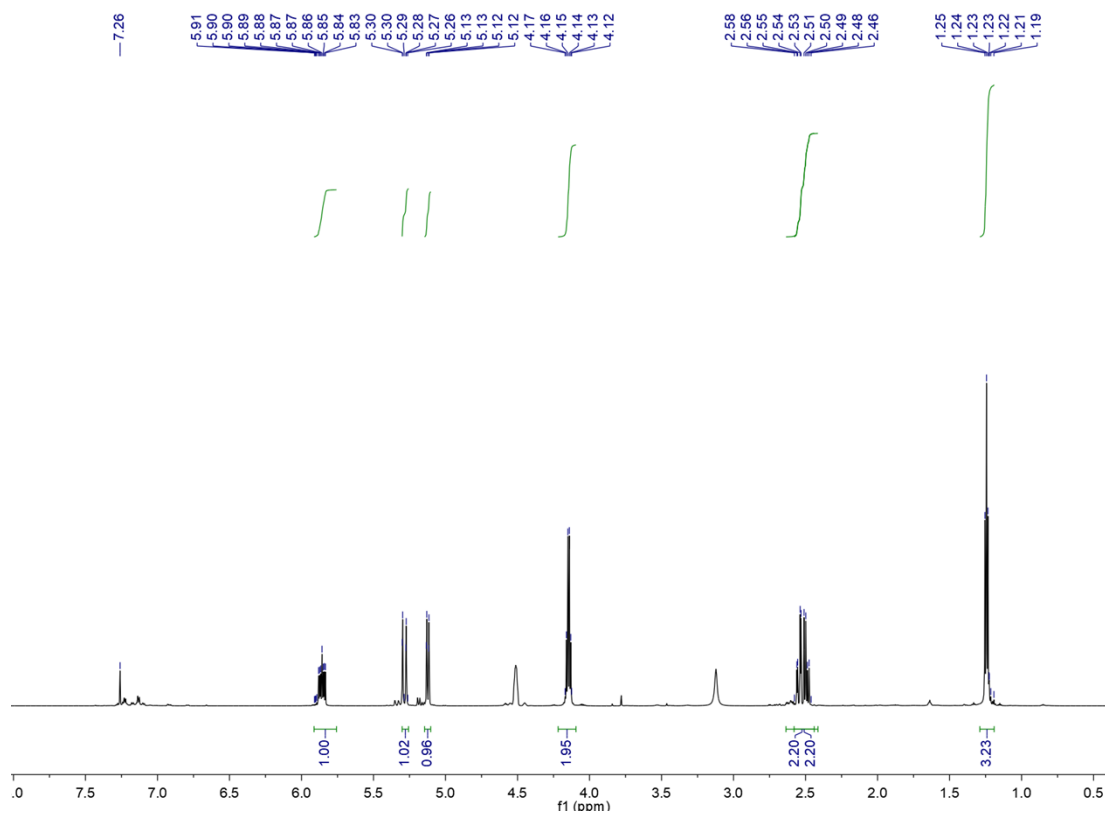

### Ethyl 3-hydroxyhexanoate (3e)

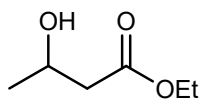

#### Characterization data:

$^1\text{H}$  NMR (700 MHz, Chloroform- $d$ )  $\delta$  4.16- 4.04 (m, 3H), 2.44 - 2.33 (m, 2H), 1.20 (q,  $J = 7.2, 6.7$  Hz, 3H), 1.16 (d,  $J = 6.7$  Hz, 3H) ppm.

$^{13}\text{C}$  NMR (101 MHz,  $\text{CDCl}_3$ )  $\delta$  171.82, 63.26, 59.62, 41.99, 21.53, 13.15 ppm.

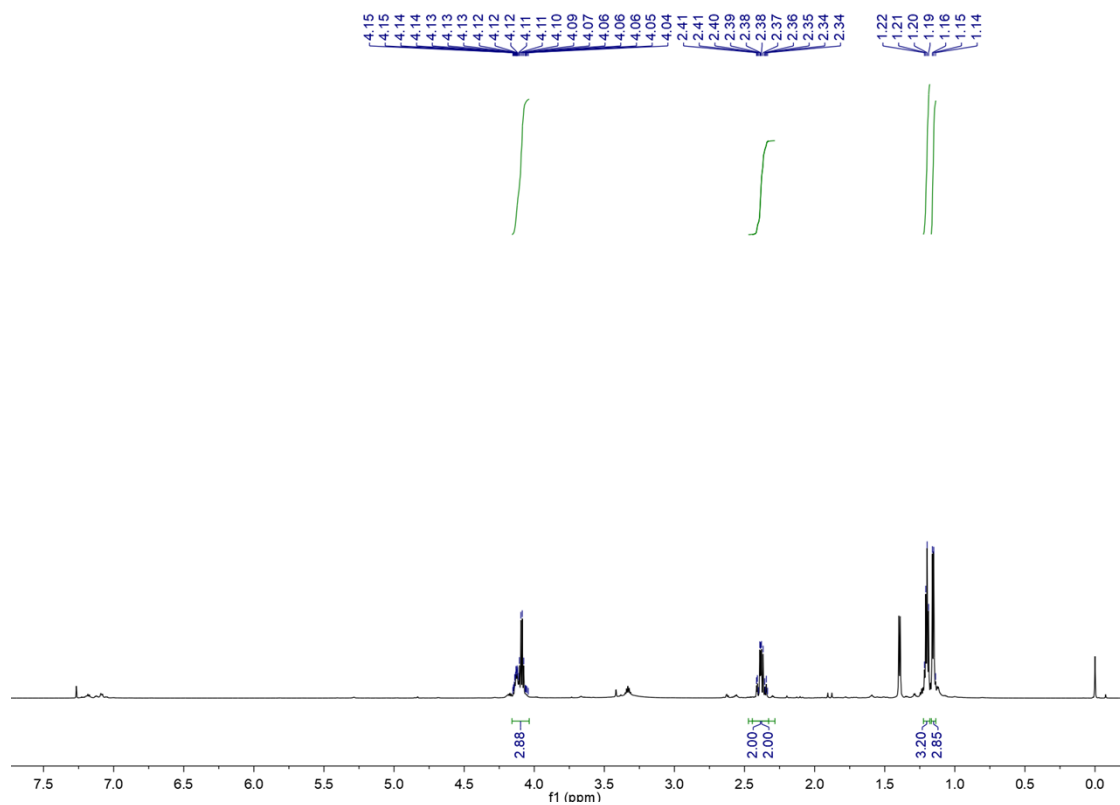

The attached original data of Figures in manuscript

Fig.4a

| $t_{\text{add},1}$ (min) | $Y_{3a}$ (%) | $\eta_{2a}$ (%) |
|--------------------------|--------------|-----------------|
| 2                        | 57.9         | 81.3            |
| 5                        | 54.9         | 74.0            |
| 10                       | 50.4         | 65.7            |

Fig.4b

| $t_1$ (min) | $Y_{3a}$ (%) | $\eta_{2a}$ (%) |
|-------------|--------------|-----------------|
| 0           | 57.5         | 78.8            |
| 5           | 56.8         | 79.6            |
| 10          | 55.1         | 71.0            |
| 15          | 50.4         | 65.7            |
| 30          | 45.8         | 65.0            |

**Fig.5a**

| $t_{add,2}$ (min) | $Y_{3a}$ (%) | $\eta_{2a}$ (%) |
|-------------------|--------------|-----------------|
| 2                 | 50.7         | 70.0            |
| 5                 | 51.4         | 65.7            |
| 10                | 50.4         | 65.7            |

**Fig.5b**

| $t_1$ (min) | $Y_{3a}$ (%) | $\eta_{2a}$ (%) |
|-------------|--------------|-----------------|
| 1           | 49.1         | 63.7            |
| 10          | 51.2         | 65.6            |
| 20          | 52.1         | 66.1            |
| 30          | 50.4         | 64.4            |
| 40          | 48.9         | 65.8            |
| 50          | 51.0         | 68.7            |

**Fig.6 Compound 3a**

| Reaction temperature (°C) | $Y_{3a}$ (%) | $\eta_{2a}$ (%) |
|---------------------------|--------------|-----------------|
| -78                       | 32.6         | 49.0            |
| 20                        | 4.7          | 6.2             |

**Fig.6 Compound 3b**

| Reaction temperature (°C) | $Y_{3b}$ (%) | $\eta_{2a}$ (%) |
|---------------------------|--------------|-----------------|
| -78                       | 32.1         | 42.8            |

|    |     |     |
|----|-----|-----|
| 20 | 4.7 | 6.0 |
|----|-----|-----|

**Fig.10a**

| Reaction temperature (°C) | $Y_{3a}$ (%) | $\eta_{2a}$ (%) |
|---------------------------|--------------|-----------------|
| -60                       | 81.4         | 89.2            |
| -40                       | 87.7         | 99.8            |
| -20                       | 92.1         | 98.8            |
| 0                         | 72.9         | 81.4            |
| 20                        | 62.3         | 70.9            |

**Fig.10b**

| Reaction temperature (°C) | $Y_{3a}$ (%) | $\eta_{2a}$ (%) |
|---------------------------|--------------|-----------------|
| -20                       | 45.8         | 84.4            |
| -40                       | 64.4         | 86.8            |
| -60                       | 90.1         | 95.3            |
| -78                       | 89.9         | 99.8            |

**Fig.11a**

| $Q_{EA}$ (mL/min) | $Y_{3a}$ (%) | $\eta_{2a}$ (%) |
|-------------------|--------------|-----------------|
| 0.5               | 63.7         | 65.4            |
| 1                 | 74.0         | 75.7            |
| 1.5               | 82.7         | 83.9            |
| 2.0               | 92.1         | 98.8            |
| 4.0               | 92.4         | 96.0            |

|     |      |      |
|-----|------|------|
| 8.0 | 93.9 | 97.5 |
|-----|------|------|

**Fig.11b**

| $Q_{H+}$ (mL/min) | $X_s$       | $t_{mix}$ (s) |
|-------------------|-------------|---------------|
| 0.5               | 0.221646001 | 0.677892407   |
| 1                 | 0.129038229 | 0.382817567   |
| 1.5               | 0.076905056 | 0.221602158   |
| 2.0               | 0.05170594  | 0.145697617   |
| 4.0               | 0.019214616 | 0.051208199   |
| 8.0               | 0.004683424 | 0.011528027   |

**Fig.12a**

| $t_3$ (s) | $Y_{3a}$ (%) | $\eta_{2a}$ (%) |
|-----------|--------------|-----------------|
| 0.25      | 85.7         | 87.2            |
| 0.5       | 85.6         | 88.6            |
| 1         | 86.9         | 90.9            |
| 5         | 81.4         | 89.2            |
| 10        | 84.6         | 89.3            |
| 20        | 84.0         | 88.6            |
| 40        | 70.0         | 74.2            |

**Fig. 12b**

| $t_4$ (s) | $Y_{3a}$ (%) | $\eta_{2a}$ (%) |
|-----------|--------------|-----------------|
| 1         | 83.3         | 86.9            |
| 30        | 83.2         | 86.3            |
| 60        | 81.4         | 89.2            |
